# Supplementary material
Source: PubMed Central journal article supplement (PMC2930407)
Supplement: 1007928107_pnas.201007928SI.pdf [file 1007928107_pnas.201007928SI.pdf]

# Supporting Information

Woolgar et al. 10.1073/pnas.1007928107

**Table S1. Details of patients included in the study**

| Patient no. | Patient initials | Side      | Age (y) | Sex | Estimated premorbid IQ | Etiology                 |
|-------------|------------------|-----------|---------|-----|------------------------|--------------------------|
| Frontal     |                  |           |         |     |                        |                          |
| 1           | PP               | Right     | 51      | M   | 115                    | Tumor                    |
| 2           | KH               | Right     | 41      | M   | 124                    | Tumor                    |
| 3           | SS               | Right     | 46      | F   | 97                     | Tumor                    |
| 4           | MS               | Right     | 68      | M   | 121                    | Infarct                  |
| 5           | CG               | Right     | 50      | F   | 111                    | Tumor                    |
| 6           | GB               | Right     | 42      | M   | 100                    | Tumor                    |
| 7           | ET               | Right     | 47      | F   | 126                    | Infarct                  |
| 8           | AS               | Right     | 62      | M   | 94                     | Tumor                    |
| 9           | CE               | Right     | 64      | M   | 120                    | Aneurysm                 |
| 10          | DR               | Right     | 55      | M   | 101                    | Tumor                    |
| 11          | FG               | Right     | 39      | F   | 106                    | Tumor                    |
| 12          | RB               | Right     | 53      | M   | 106                    | Tumor                    |
| 13          | PB               | Right     | 53      | F   | 87                     | Tumor                    |
| 14          | RH               | Right     | 68      | F   | 118                    | Tumor                    |
| 15          | PG               | Right     | 28      | F   | 110                    | Tumor                    |
| 16          | MD               | Right     | 68      | M   | 127                    | Infarct                  |
| 17          | JB               | Right     | 60      | M   | 127                    | Tumor                    |
| 18          | MS               | Right     | 61      | F   | 111                    | Tumor                    |
| 19          | JME              | Right     | 65      | M   | 122                    | Tumor                    |
| 20          | LB               | Right     | 29      | F   | 88                     | Tumor                    |
| 21          | NM               | Right     | 46      | M   | 88                     | Tumor                    |
| 22          | JT               | Left      | 56      | M   | 82                     | Tumor                    |
| 23          | MB               | Left      | 45      | F   | 108                    | Tumor                    |
| 24          | GD               | Left      | 44      | F   | 102                    | Tumor                    |
| 25          | SD               | Left      | 37      | F   | 110                    | Aneurysm and hematoma    |
| 26          | MB               | Left      | 45      | M   | 108                    | Hemorrhage               |
| 27          | CM               | Left      | 54      | F   | 118                    | Tumor                    |
| 28          | AD               | Left      | 61      | F   | 120                    | Infarct                  |
| 29          | DT               | Left      | 69      | M   | 111                    | Infarct                  |
| 30          | PP               | Left      | 58      | F   | 103                    | Tumor                    |
| 31          | AC               | Left      | 66      | M   | 97                     | Infarct                  |
| 32          | PM               | Left      | 47      | M   | 121                    | Tumor                    |
| 33          | TG               | Left      | 33      | M   | 121                    | Abscess                  |
| 34          | YS               | Left      | 64      | F   | 98                     | Infarct                  |
| 35          | BR               | Left      | 67      | F   | 116                    | Tumor                    |
| 36          | WB               | Left      | 29      | M   | 98                     | Tumor                    |
| 37          | DC               | Bilateral | 27      | M   | 100                    | Abscess                  |
| 38          | MD               | Bilateral | 65      | F   | 111                    | Tumor                    |
| 39          | DP               | Bilateral | 41      | M   | 115                    | Tumor                    |
| 40          | IB               | Bilateral | 38      | F   | 120                    | Tumor                    |
| 41          | MEA              | Bilateral | 59      | F   | 108                    | Tumor                    |
| 42          | MR               | Bilateral | 46      | M   | 132                    | Tumor                    |
| 43          | RS               | Bilateral | 59      | F   | 128                    | Infarcts                 |
| 44          | SV               | Bilateral | 41      | F   | 128                    | Tumor                    |
| Parietal    |                  |           |         |     |                        |                          |
| 45          | MD               | Right     | 65      | M   | 102                    | Hemorrhage               |
| 46          | EO               | Right     | 60      | M   | 74                     | Hematoma                 |
| 47          | JR               | Right     | 44      | F   | 122                    | Tumor                    |
| 48          | GI               | Right     | 48      | F   | 115                    | Cerebrovascular accident |
| 49          | IH               | Left      | 48      | F   | 124                    | Tumor                    |
| 50          | PD               | Left      | 49      | M   | 123                    | Tumor                    |
| 51          | KM               | Left      | 68      | M   | 118                    | Tumor                    |

**Table S1. Cont.**

| Patient no.      | Patient initials | Side      | Age (y) | Sex | Estimated premorbid IQ | Etiology             |
|------------------|------------------|-----------|---------|-----|------------------------|----------------------|
| 52               | JL               | Bilateral | 49      | F   | 117                    | Tumor                |
| 53               | JM               | Bilateral | 49      | M   | 118                    | Tumor                |
| Occipitotemporal |                  |           |         |     |                        |                      |
| 54               | RM               | Right     | 65      | M   | 120                    | Infarct              |
| 55               | JF               | Right     | 54      | M   | 113                    | Infarct              |
| 56               | AW               | Right     | 36      | M   | 107                    | Tumor                |
| 57               | PD               | Right     | 48      | M   | 118                    | Infarct              |
| 58               | AM               | Right     | 19      | F   | 101                    | Tumor and hemorrhage |
| 59               | SH               | Right     | 37      | M   | 123                    | Hemorrhage           |
| 60               | PF               | Right     | 44      | M   | 77                     | Aneurysm             |
| 61               | RB               | Left      | 21      | M   | 91                     | Tumor                |
| 62               | TC               | Left      | 64      | M   | 105                    | Hemorrhage           |
| 63               | EA               | Left      | 38      | F   | 102                    | Infarct              |
| 64               | PT               | Left      | 49      | F   | 84                     | Abscess              |
| 65               | AO               | Left      | 36      | F   | 108                    | Tumor                |
| 66               | JB               | Left      | 53      | F   | 103                    | Infarct              |
| 67               | AS               | Left      | 58      | M   | 98                     | Tumor                |
| 68               | CC               | Left      | 53      | M   | 124                    | Infarct              |
| 69               | WL               | Left      | 67      | M   | 120                    | Infarct              |
| 70               | PC               | Left      | 55      | M   | 90                     | Tumor                |
| 71               | CK               | Left      | 57      | F   | 121                    | Tumor                |
| 72               | NA               | Left      | 41      | M   | 101                    | Abscess              |
| 73               | PN               | Left      | 65      | F   | 91                     | Infarct              |
| 74               | JF               | Left      | 68      | M   | 122                    | Infarct/inflammation |
| 75               | TB               | Left      | 24      | M   | 105                    | Cavernoma            |
| Mixed*           |                  |           |         |     |                        |                      |
| 76               | RC               | Right     | 69      | M   | 117                    | Infarct              |
| 77               | BR               | Right     | 65      | F   | 118                    | Hemorrhage           |
| 78               | OS               | Right     | 68      | M   | 107                    | Tumor                |
| 79               | BT               | Left      | 70      | M   | 103                    | Infarct              |
| 80               | JL               | Left      | 52      | M   | 94                     | Infarct              |

\*Mixed group refers to patients with lesions affecting more than one region.
